# Supplementary material
Source: MDPI journal article supplement (https://www.mdpi.com/2313-0105/10/2/58)
Supplement: s1 [file s1]

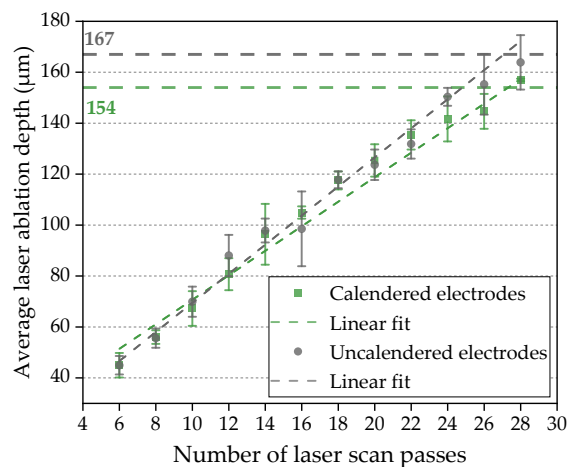

**Figure S1.** Laser ablation depth in calendered and uncalendered NMC 622 electrodes with increasing number of laser scan passes using laser parameters for L2 patterning.

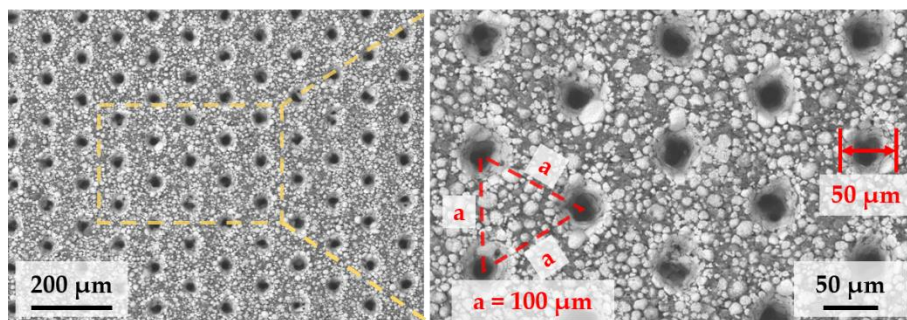

**Figure S2.** SEM images of laser structured electrodes with Ho structure providing a periodicity of  $a = 100 \mu\text{m}$  (equilateral triangle).

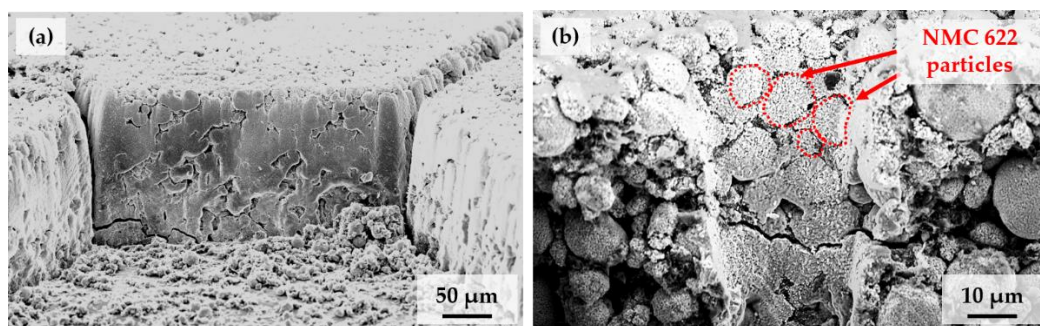

**Figure S3.** SEM images of (a) a sidewall of laser patterned NMC 622 electrodes with HexHo structure and (b) the cross-sectional view of a hole in the center of a hexagonal pillar.

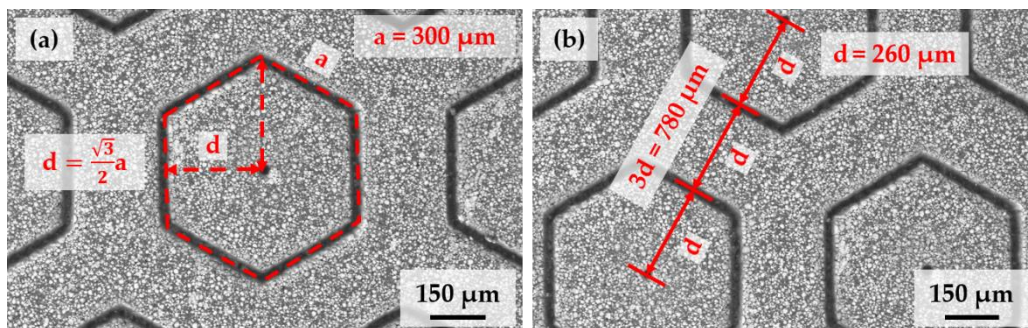

**Figure S4.** SEM images of laser structured NMC 622 electrodes with Sep.HexHo structure. (a) A hexagon with central hole and (b) the distance between adjacent hexagons.

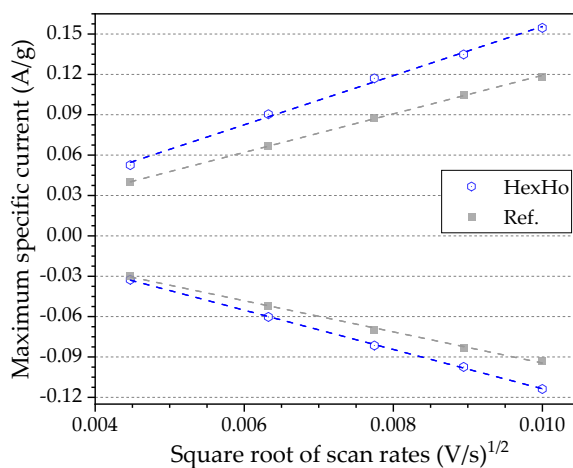

**Figure S5.** The maximum specific current versus square root of scan rates for reference cell and those having laser structured NMC 622 cathodes with HexHo pattern type.

**Table S1.** The total surface areas of laser structured electrodes with different pattern types and their surface area increase in contrast to the unstructured electrode.

| Pattern types | Total surface area ( $\text{mm}^2$ ) | Surface area increase (%) |
|---------------|--------------------------------------|---------------------------|
| Unstructured  | 113                                  | -                         |
| L1            | 260                                  | 130                       |
| L2            | 252                                  | 123                       |
| LiHo          | 234                                  | 107                       |
| GHo           | 193                                  | 71                        |
| Ho            | 252                                  | 123                       |
| Hex           | 226                                  | 100                       |
| HexHo         | 231                                  | 104                       |
| Sep.HexHo     | 207                                  | 83                        |
